# Supplementary material
Source: ML conference proceedings conference paper supplement (https://openaccess.thecvf.com/content/WACV2026/html/El-Jiz_Isolating_the_Role_WACV_2026_paper.html)

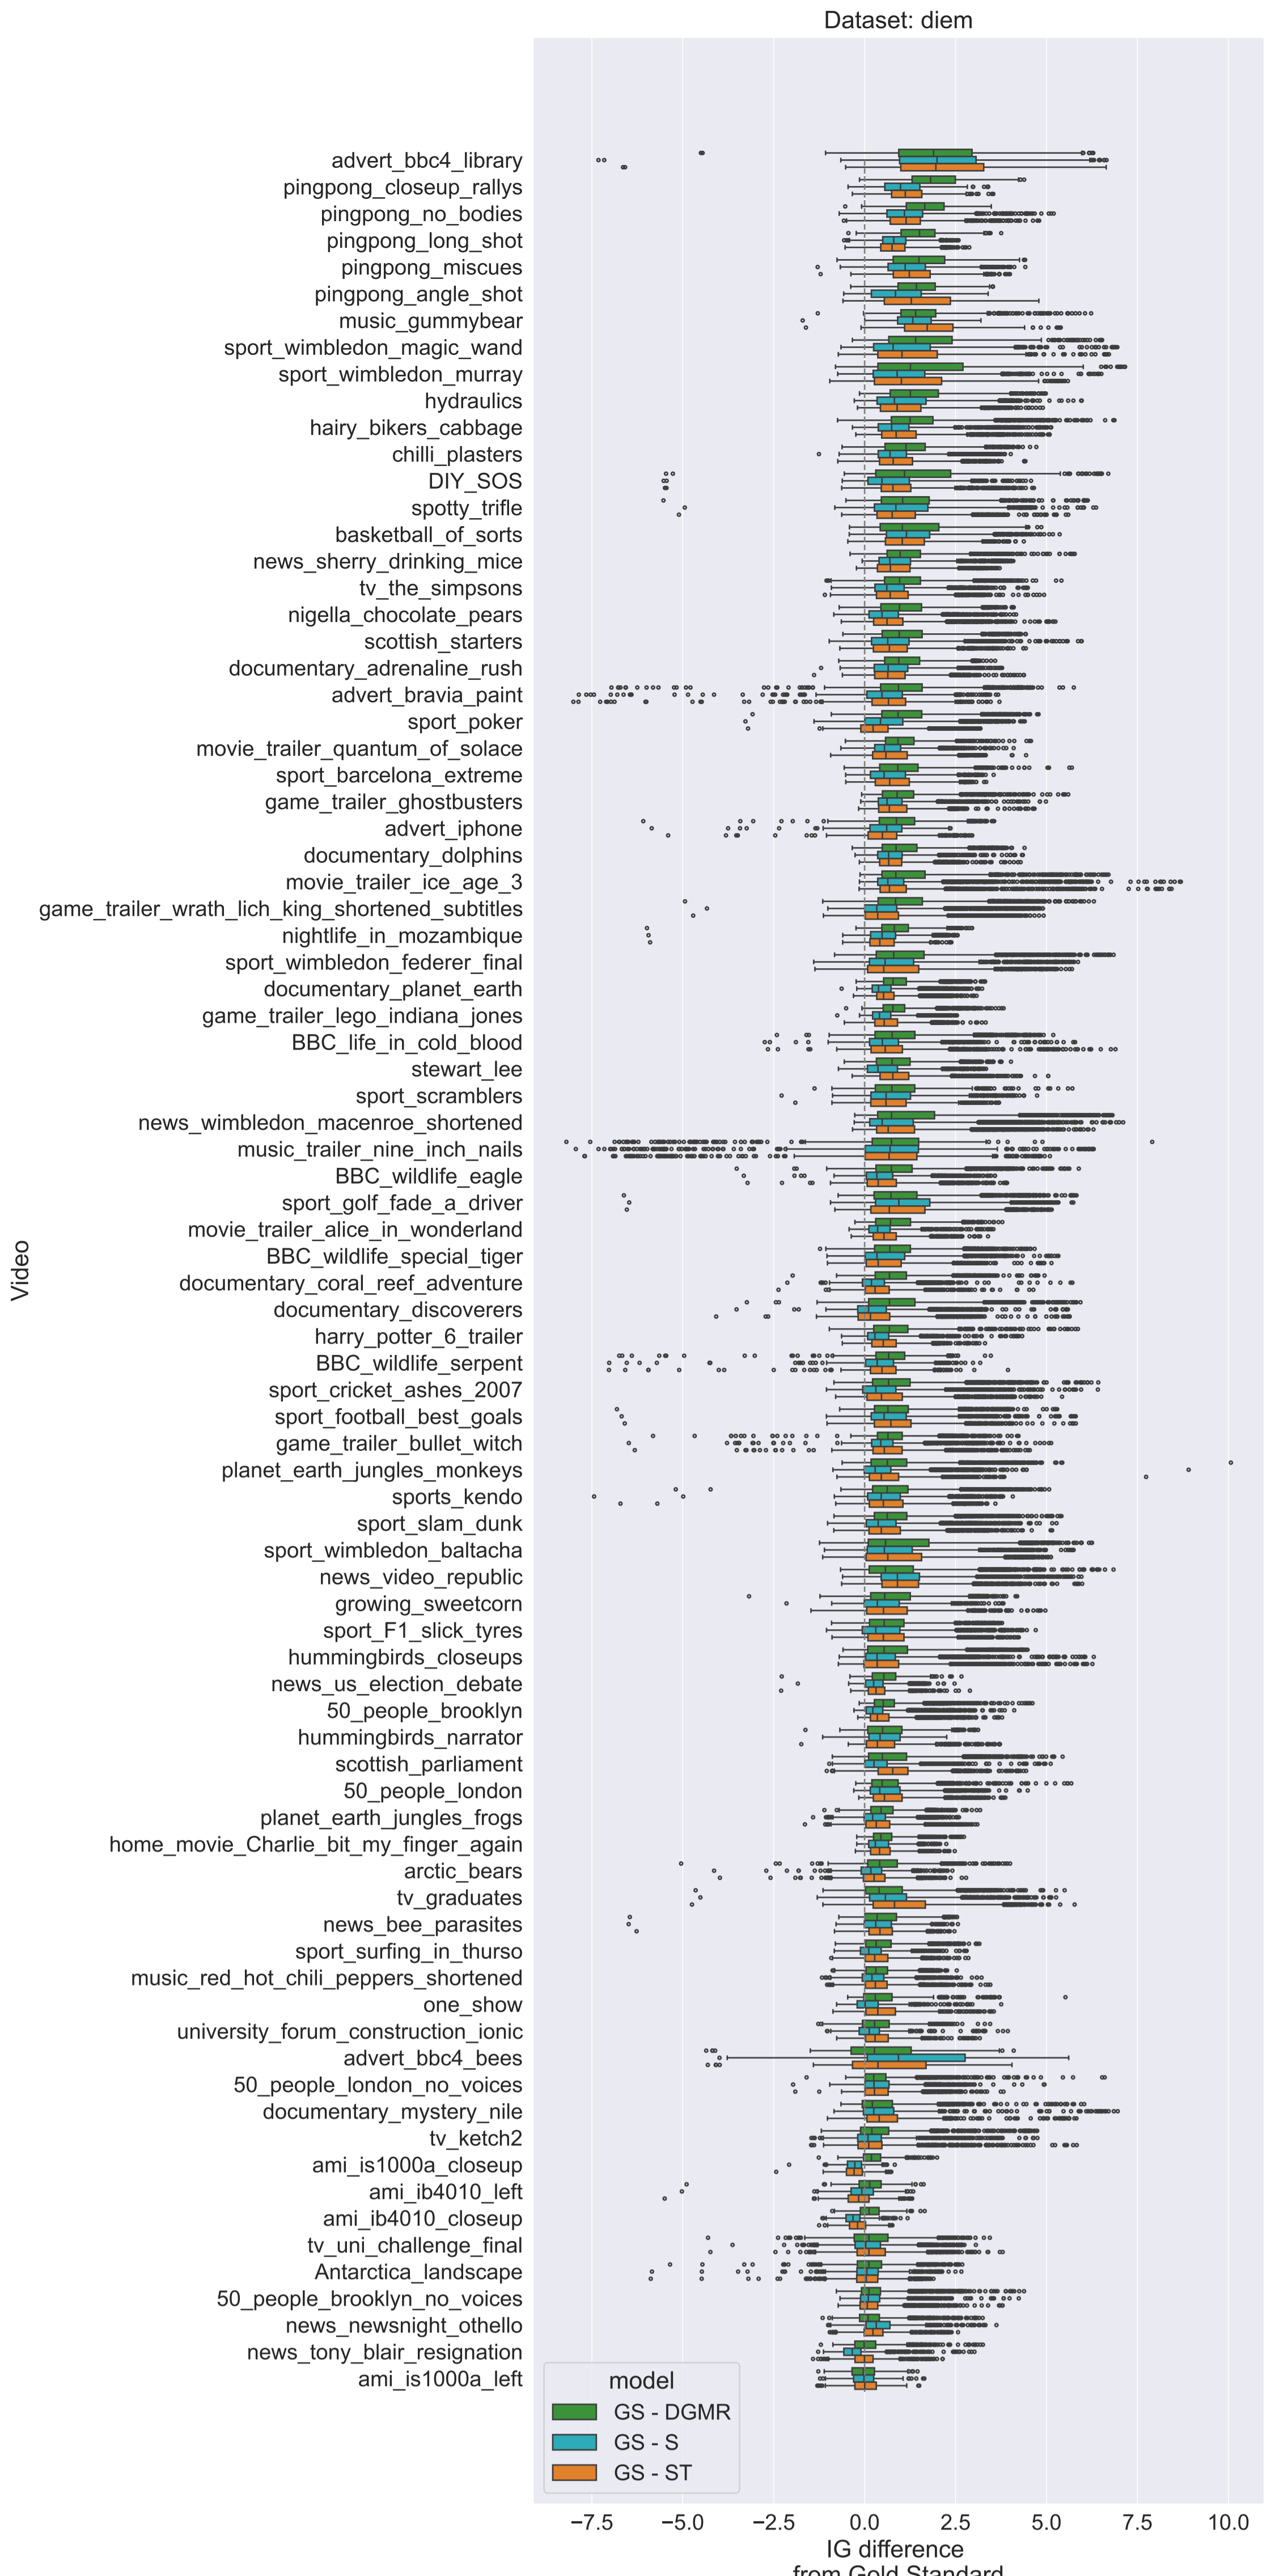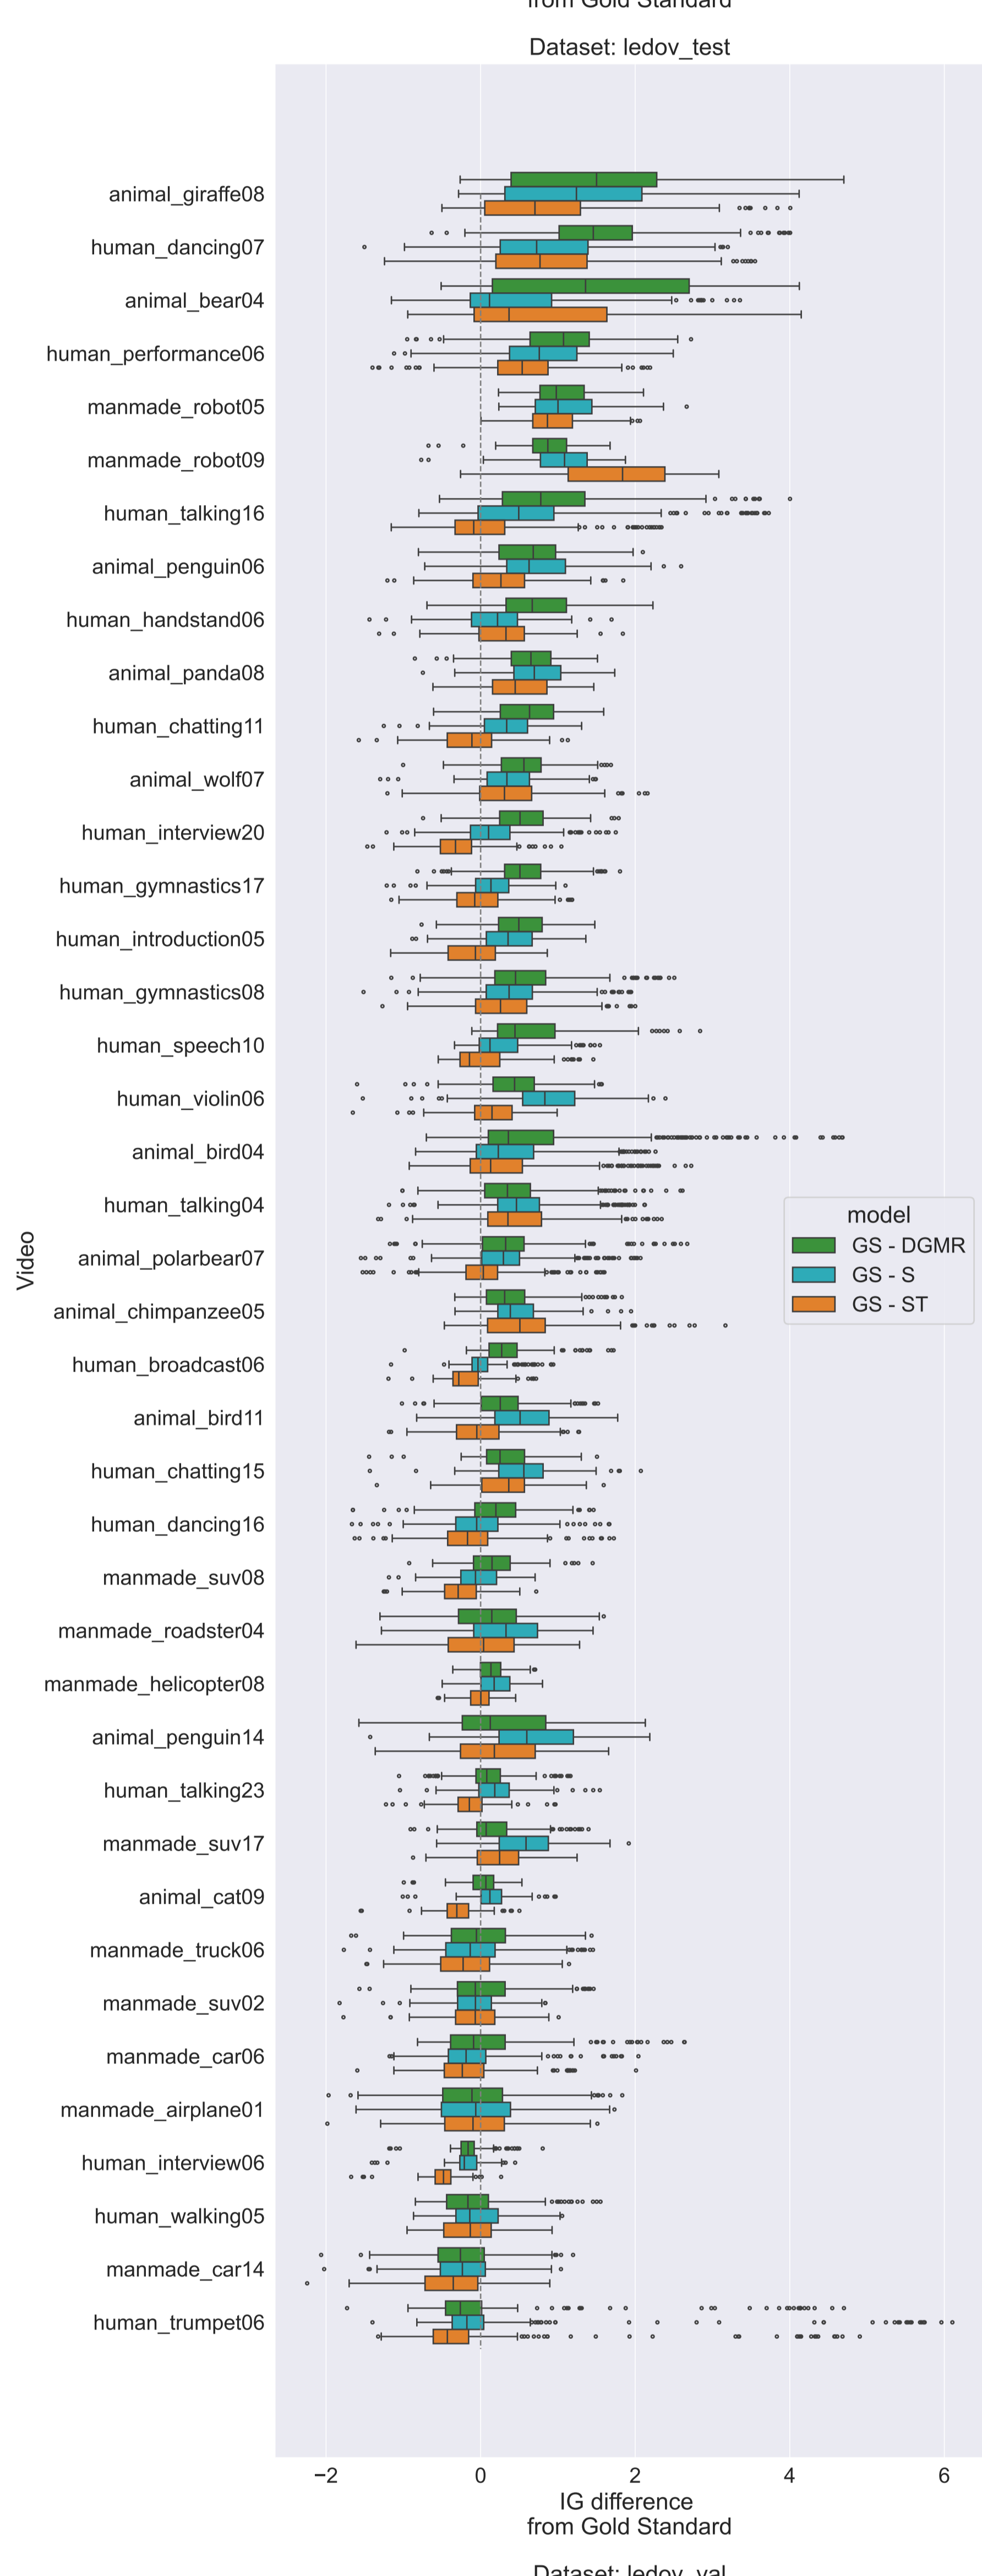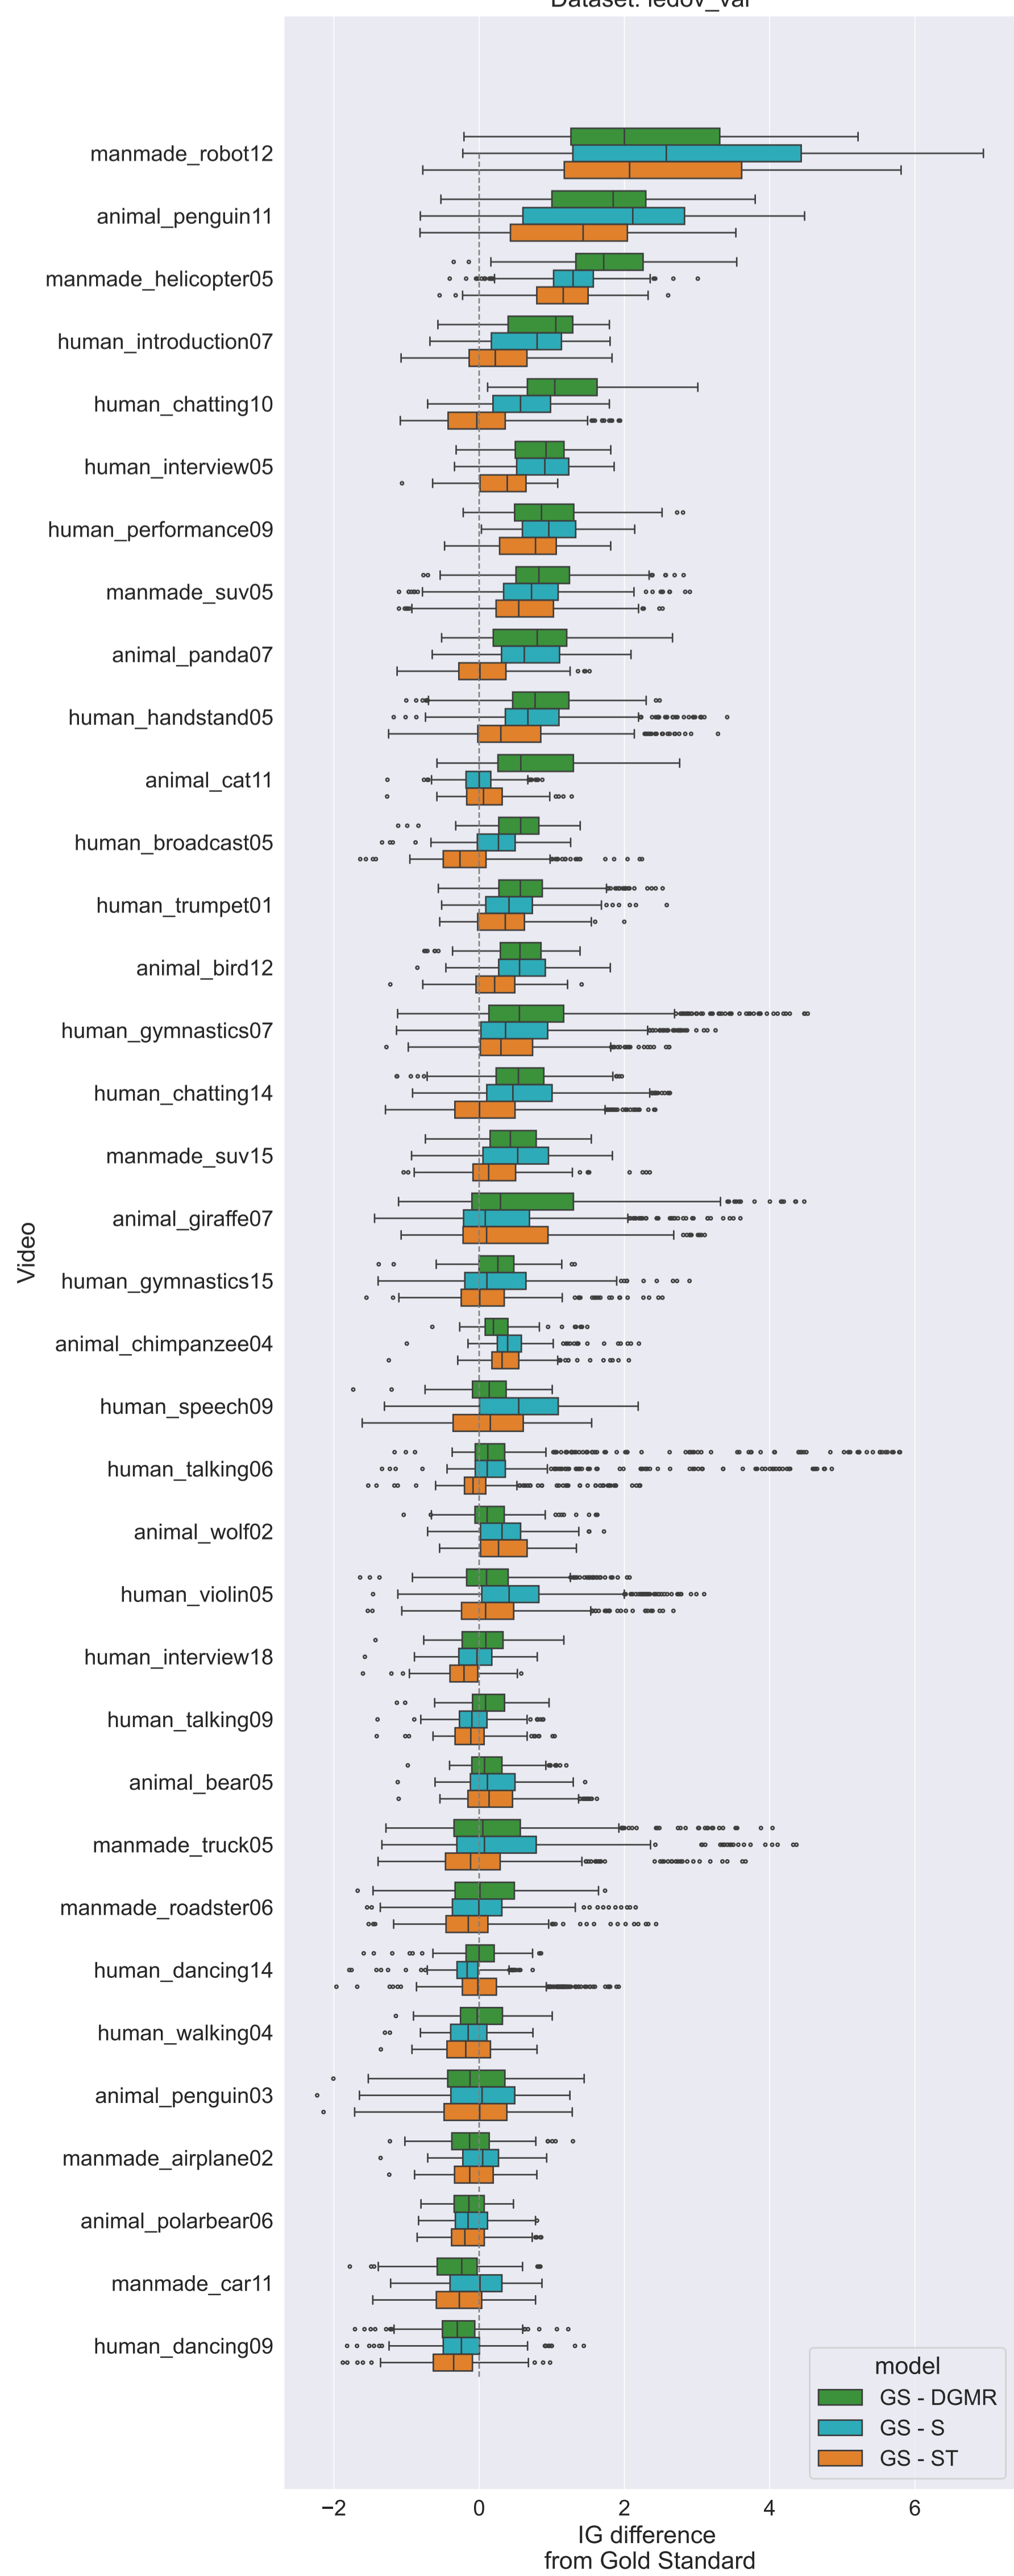

Supplement: Supplementary file 1 [file 01_videoboxplots_allds_gs_dgmr_diff.pdf › 02749_supp/01_videoboxplots_allds_gs_dgmr_diff.pdf]

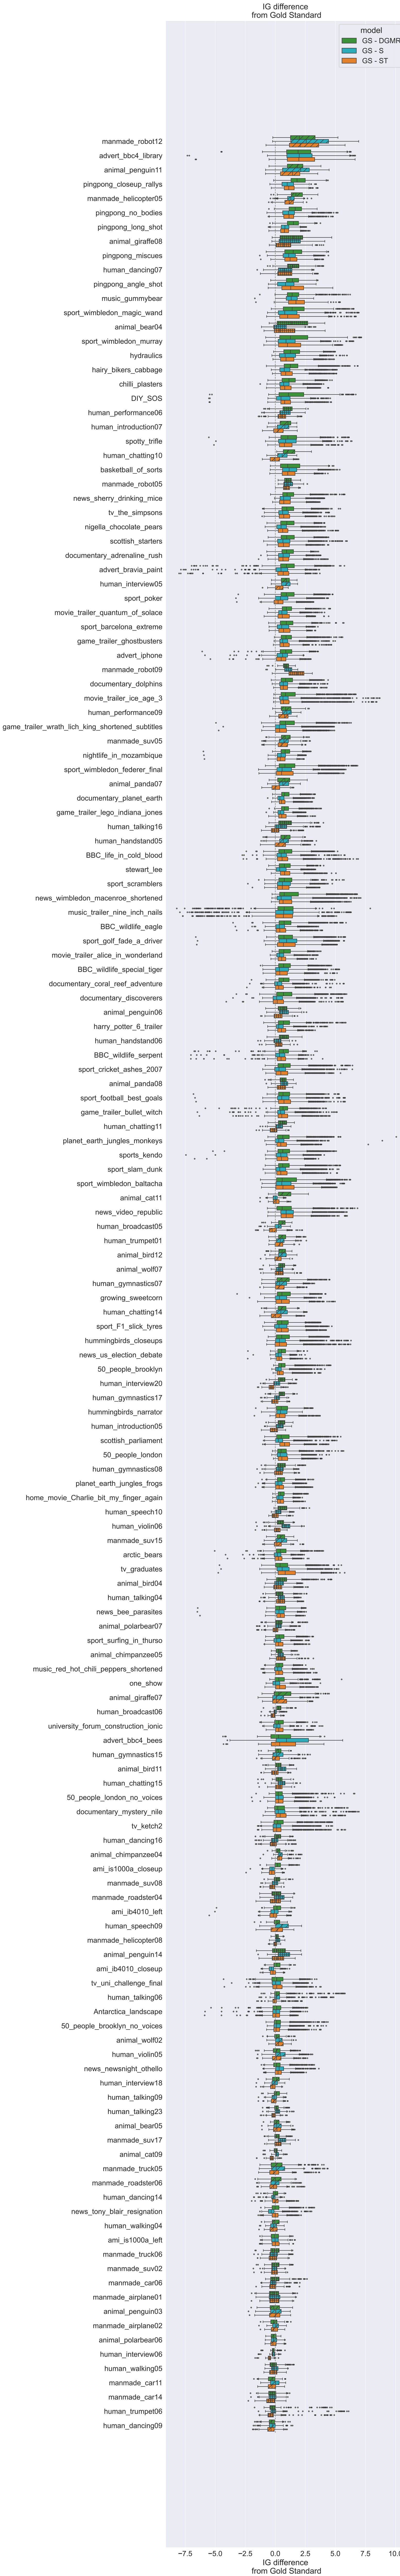

Supplement: Supplementary file 2 [file 02_all_videos_ranked_by_dgmr_difficulty.pdf › 02749_supp/02_all_videos_ranked_by_dgmr_difficulty.pdf]

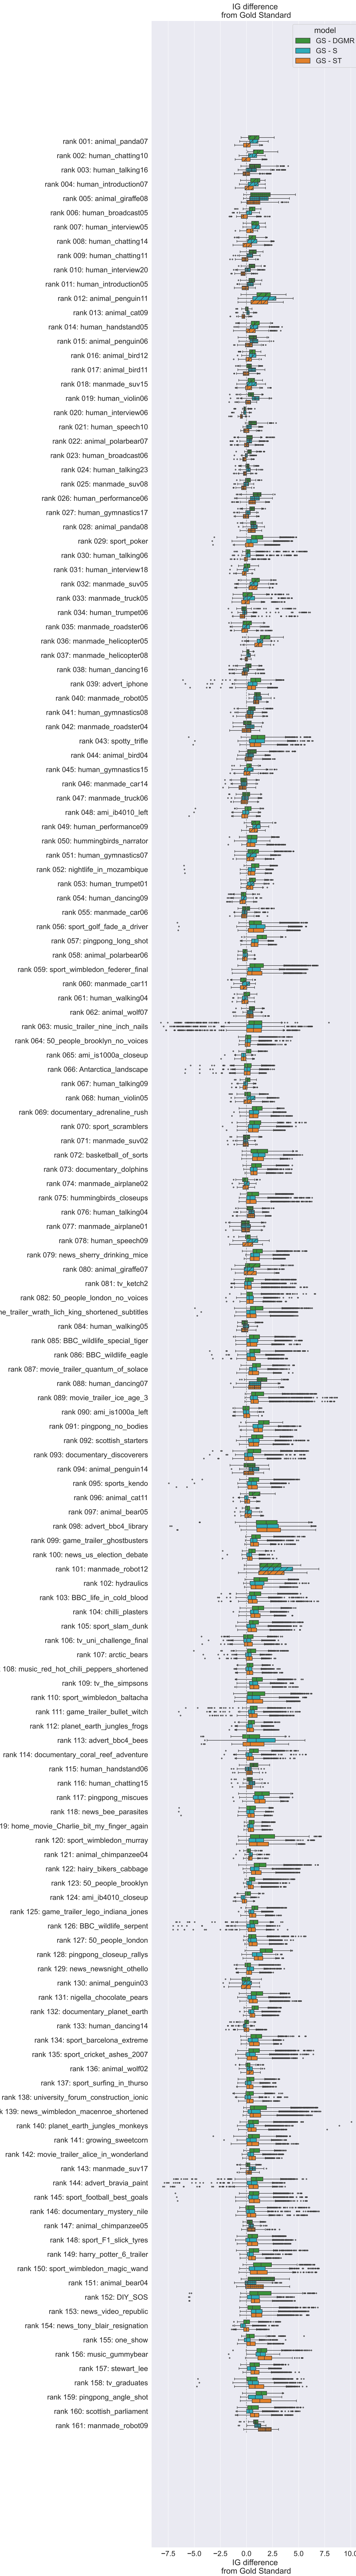

Supplement: Supplementary file 3 [file 03_videos_ranked_by_temporal_benefit.pdf › 02749_supp/03_videos_ranked_by_temporal_benefit.pdf]

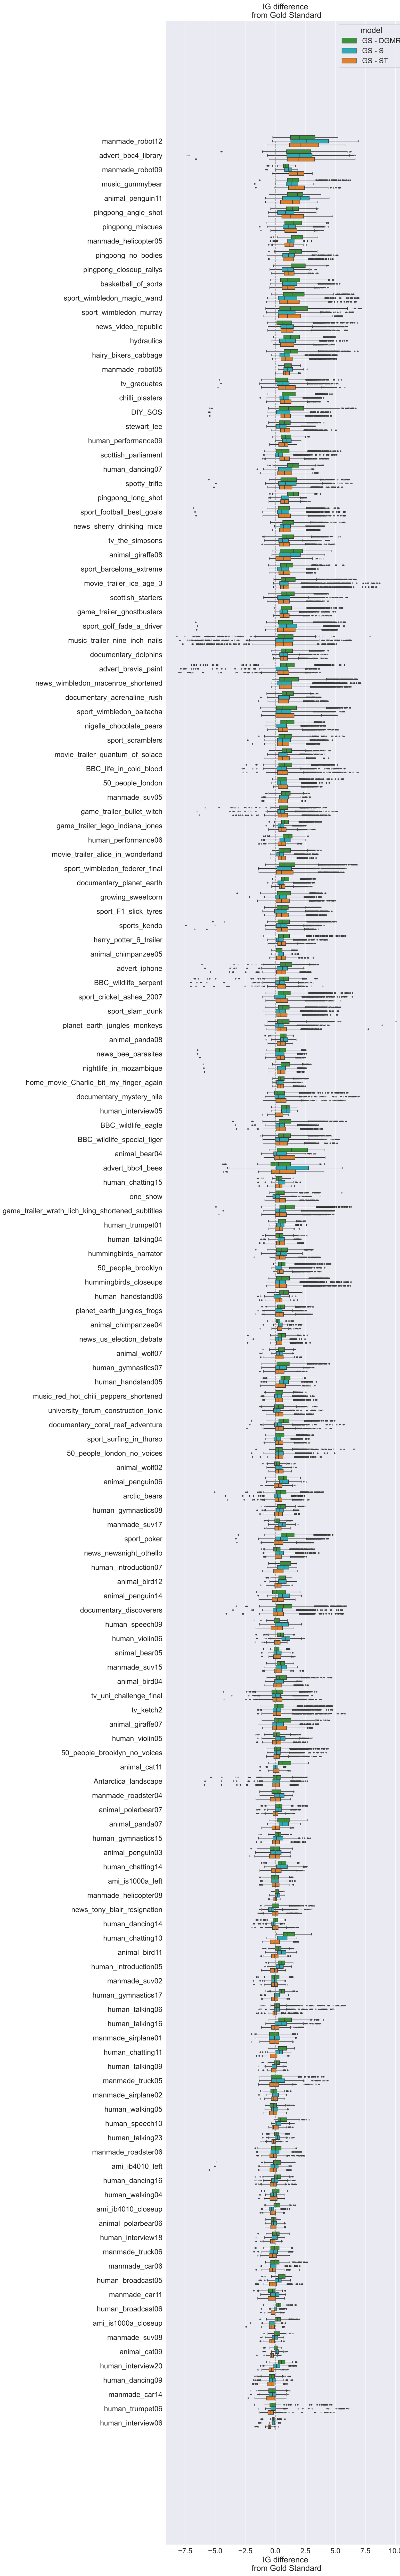

Supplement: Supplementary file 4 [file 04_videos_ranked_by_st_difficulty.pdf › 02749_supp/04_videos_ranked_by_st_difficulty.pdf]

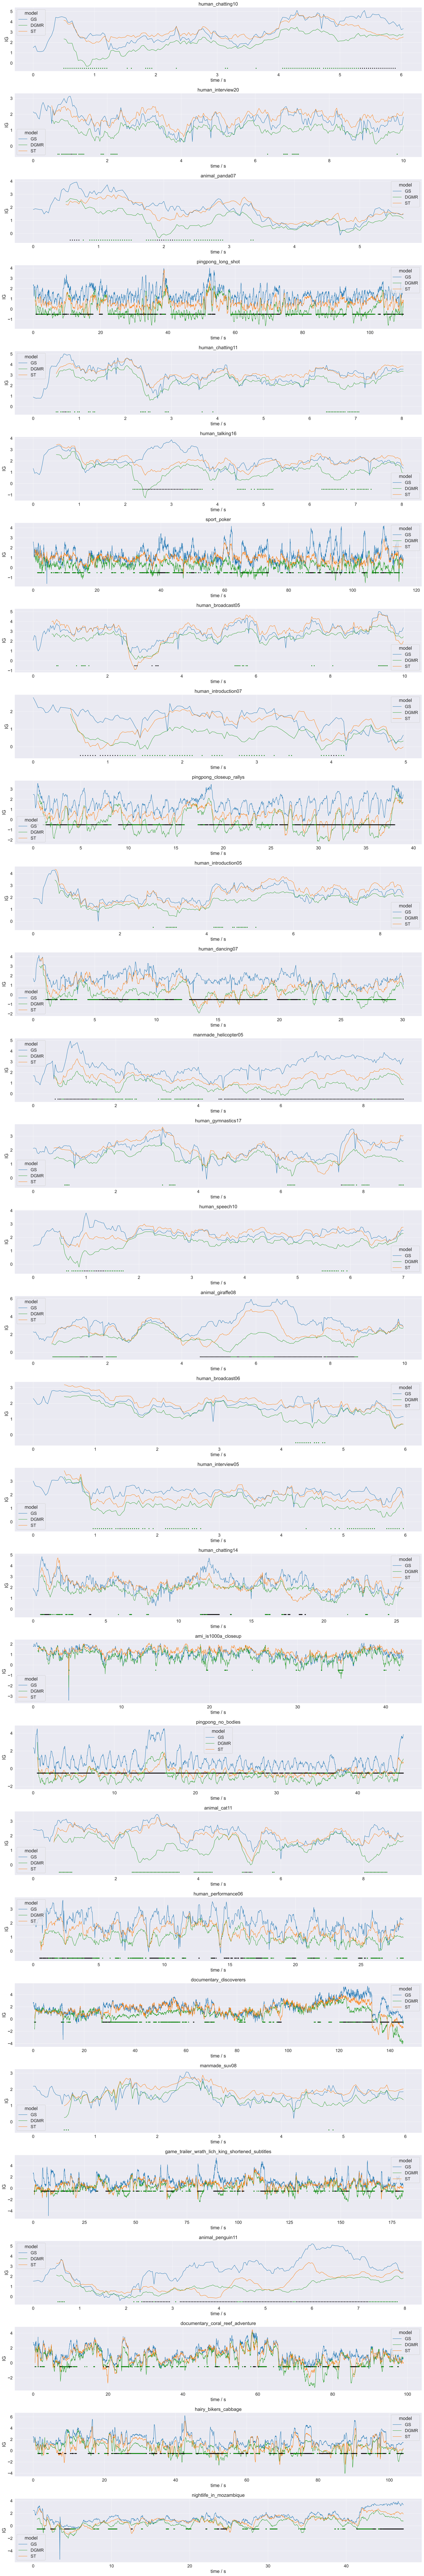

Supplement: Supplementary file 5 [file 08_top30_st_vs_dgmr_median_improvement_timeseries.pdf › 02749_supp/08_top30_st_vs_dgmr_median_improvement_timeseries.pdf]

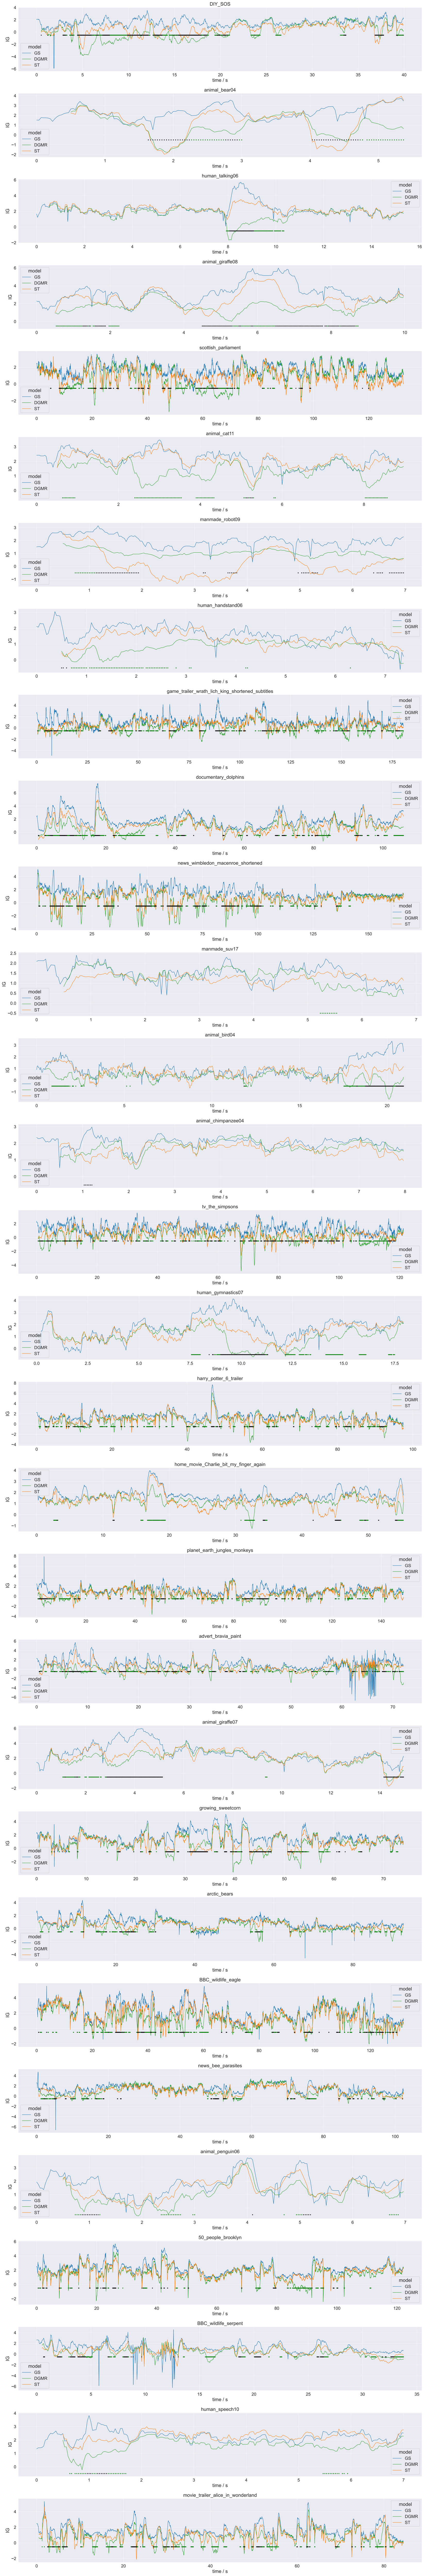

Supplement: Supplementary file 6 [file 10_top30_st_vs_dgmr_skew_based_timeseries.pdf › 02749_supp/10_top30_st_vs_dgmr_skew_based_timeseries.pdf]

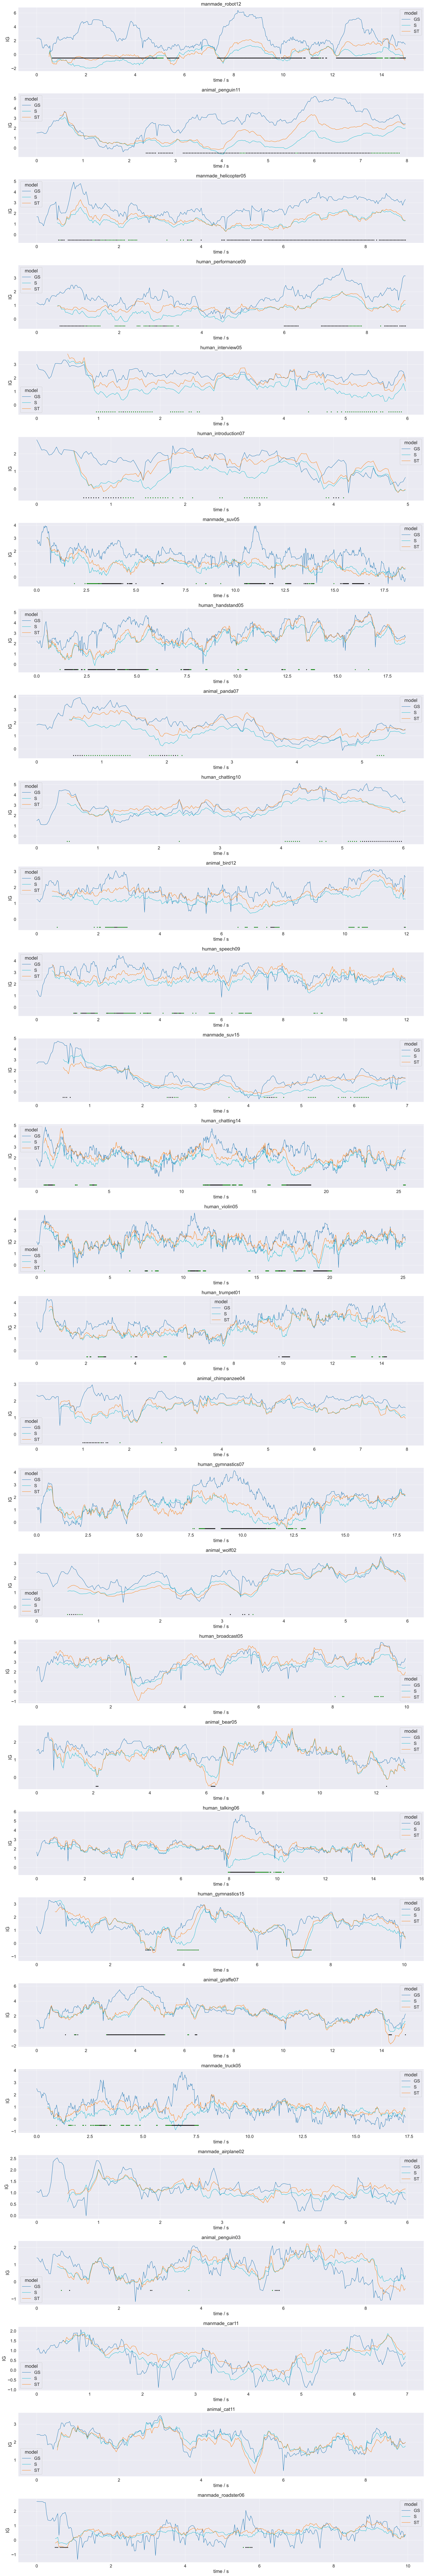

Supplement: Supplementary file 7 [file 12_top30_gs_vs_spatial_only_timeseries.pdf › 02749_supp/12_top30_gs_vs_spatial_only_timeseries.pdf]

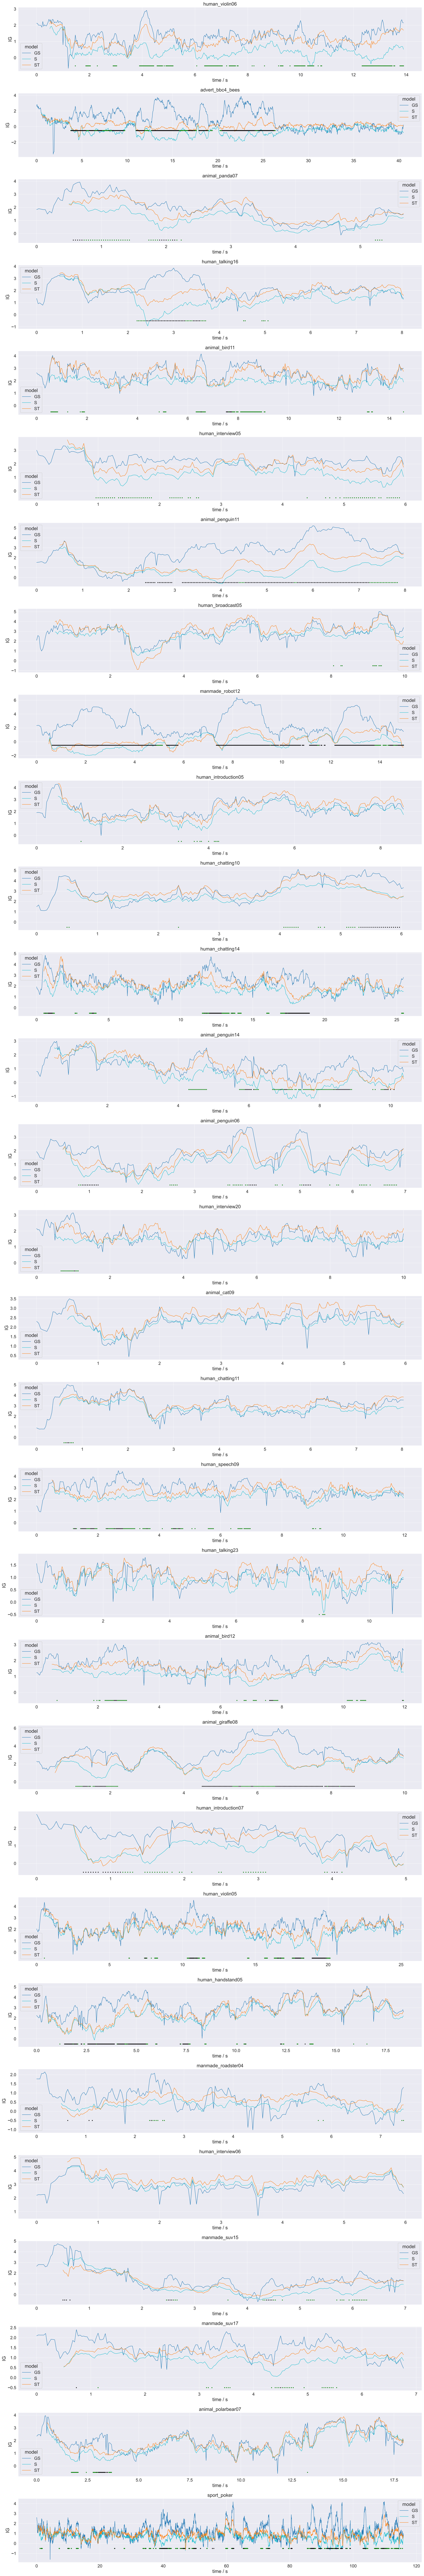

Supplement: Supplementary file 8 [file 14_top30_st_vs_spatial_only_timeseries.pdf › 02749_supp/14_top30_st_vs_spatial_only_timeseries.pdf]
